# Supplementary material for: 4-Hydroxy-2-nonenal induces apoptosis by activating ERK1/2 signaling and depleting intracellular glutathione in intestinal epithelial cells
Source: PubMed Central journal article supplement (PMC5020658; doi:10.1038/srep32929), 2016-09-13
Supplement: srep32929-s1.pdf [file srep32929-s1.pdf]

## SUPPLEMENTARY INFORMATION

4-Hydroxy-2-nonenal induces apoptosis by activating ERK1/2 signalling and depleting intracellular glutathione in intestinal epithelial cells”

Yun Ji, <sup>1</sup> Zhaolai Dai, <sup>1</sup> Guoyao Wu, <sup>1,2</sup> Zhenlong Wu<sup>1, \*</sup>

<sup>1</sup>State key Laboratory of Animal Nutrition, College of Animal Science and Technology, China Agricultural University, Beijing, 100193, P. R. China

<sup>2</sup>Department of Animal Science, Texas A&M University, College Station, TX 77843, USA

\* To whom correspondence should be addressed:

Zhenlong Wu, Ph.D

Department of Animal Nutrition and Feed Science

College of Animal Science and Technology

China Agricultural University

Beijing, 100193, China

Tel/Fax: 86-10-62731003

Email: bio2046@hotmail.com

## Supplementary Figure legends

**Figure S1 (A)** P53 was not implicated in ERK1/2 activation. IEC-6 cells were treated with 4-HNE as indicated for 8 h. Western blot was conducted to analyze the protein level of p53, Bax, Bcl-xL/S, pro-caspase-3, ERK1/2, and p-ERK1/2.  $\beta$ -actin was used as the loading control. **(B)** LC3 was not activated by 4-HNE with or without NAC pretreatment. IEC-6 cells pretreated with or without NAC (5 mM, 2 h) were treated with 4-HNE (80  $\mu$ M) for the time indicated. Protein levels of LC3A/B were determined by western blot analysis.  $\beta$ -actin was used as the reference control.

**A**

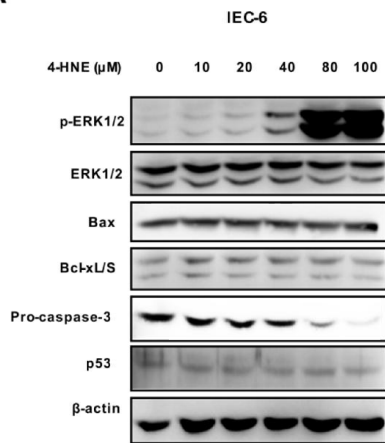

**B**

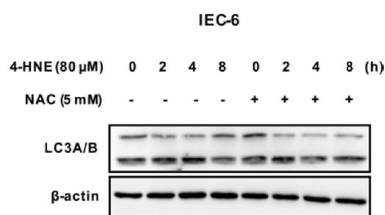

## Supplementary Table S1: List of primers used for qRT- PCR analysis

**Table S1A. List of primers used for qRT- PCR analysis in IEC-6 cells**

| Gene           | Accession No.  | Primers (5'-3')                                    | Product size (bp) |
|----------------|----------------|----------------------------------------------------|-------------------|
| GCLC           | NM_012815.2    | F: CATTGATTGTCGCTGGGGAG<br>R: AGATCTCCGTGTCGATGGTC | 188               |
| GSS            | XM_006235308.1 | F: CGTGGTGCTACTGATTGCTC<br>R: AACAGCCTTCGGTTTTGGTC | 153               |
| GSTA4          | NM_001106840.1 | F: TTTCAAGGCAGGGGAAGGAT<br>R: GTGTCAGTAGCATCCCGTCT | 172               |
| HO1            | NM_012580.2    | F: TGTAAATGCAGTGTGGCCC<br>R: AAGGAAGACACAGGAAGGGG  | 144               |
| NQO1           | NM_017000.3    | F: CCTGATTGTATTGGCCCACG<br>R: AGATTGACACCTCCCATC   | 103               |
| MKP1           | NM_053769.3    | F: CAAAGCCCCATCACAACTC<br>R: GAACTCAGTGGAAGCTCGGGA | 187               |
| $\beta$ -actin | NM_031144.3    | F: TGTGTTGTCCCTGTATGCCT<br>R: CCCTCATAGATGGGCACAGT | 90                |

GCLC, glutamate cysteine ligase catalytic subunit; GSS, glutathione synthetase; GSTA4, glutathione S-transferase alpha 4; HO1, heme oxygenase1; NQO1, NAD(P)H : quinone oxidoreductase; MKP1, mitogen-activated protein kinase phosphatase-1.

**Table S1B. List of primers used for qRT- PCR analysis in IPEC-1 cells**

| Gene           | Accession No.  | Primers (5'-3')                                     | Product size (bp) |
|----------------|----------------|-----------------------------------------------------|-------------------|
| GCLC           | XM_003128335.4 | F: GCGGAAGTAAAATCGACGCT<br>R: TGTGAGTCCTGGGTCAATCC  | 89                |
| GSS            | NM_001244625.1 | F: GCAGGGAAAGACACTTGTGG<br>R: ACAGGGTATGGGTTGTGCGAG | 120               |
| GSTA4          | XM_005666463.1 | F: CGCAGGAGTCGAGTTTGATG<br>R: AGAGATGGTGCTTGTCTGCT  | 170               |
| NQO1           | NM_001159613.1 | F: CTGGTTTGAACGTGTGCTCA<br>R: GCAGAGAGTACATGGAGCCA  | 131               |
| HO1            | NM_001004027.1 | F: GGCCAGGTCCTCAAGAAGAT<br>R: GAAAGTGAAGAAGGCCAGGC  | 78                |
| MKP1           | NM_001256075.1 | F: CCTTCCCCTGAGTACTAGCG<br>R: GGGGATGCTCTTGTACTGGT  | 235               |
| $\beta$ -actin | XM_003357928.2 | F: TCTTCCAGCCCTCCTTCTTG<br>R: TCCTTCCTGATGTCCACGTC  | 94                |

GCLC, glutamate cysteine ligase catalytic subunit; GSS, glutathione synthetase; GSTA4, glutathione S-transferase alpha 4; NQO1, NAD(P)H : quinone oxidoreductase; HO1, heme oxygenase1; MKP1, mitogen-activated protein kinase phosphatase-1.
